# Supplementary material for: Wheat Elongator Subunit 4 Negatively Regulates Freezing Tolerance by Regulating Ethylene Accumulation
Source: MDPI journal article supplement (doi:10.3390/ijms23147634), 2022-07-11
Supplement: s1 [file s1]

Table S1 – Primers used and their sequences.

| Primer name            | 5' –3'                                    | usage                                                              |
|------------------------|-------------------------------------------|--------------------------------------------------------------------|
| TaELP4-7B-F            | ATGGCTGCACCAAACGTTTCG                     | Amplification of full-length cds of TaELP4-7B                      |
| TaELP4-7B-R            | TTAGAAATCGAGCTGCGAGC                      |                                                                    |
| VIGS-TaELP4-F          | AACGCTAGCTGGACGAGCAAGTGA<br>TGAGG         | Construction of vector $\gamma$ -TaELP4                            |
| VIGS-TaELP4-R          | GGCGCTAGCCTGCACTAAGATTTC<br>CACCTC        |                                                                    |
| 16318h-TaELP4-7B-GFP-F | GCTGTACAAGGTCGACATGGCCGC<br>CGCCGCCG      | Construction of subcellular localization vector 35S::TaELP4-7B-GFP |
| 16318h-TaELP4-7B-GFP-R | TACCGGATCCACTAGTGAAATCGA<br>GCTGCGAG      |                                                                    |
| 16318h-AtELP4-GFP-F    | AGGACAGCCCAAGCTTATGGCTGC<br>ACCAAACGTTTCG | Construction of subcellular localization vector 35S::AtELP4-GFP    |
| 16318h-AtELP4-GFP-R    | GCAGGCATGCAAGCTTAAAATCTA<br>GTGCTCCGGAT   |                                                                    |
| 1300nGFP-8530-inF      | GCTGTACAAGGTCGACATGGCCGC<br>CGCCGCCG      | Construction of transgenic vector 35S::TaELP4-7B-GFP               |
| 1300nGFP-8530-inR      | TACCGGATCCACTAGTGAAATCGA<br>GCTGCGAG      |                                                                    |
| qTaELP4-7A-F           | CTCTTCGCTGCTCCCATGAA                      | Primers for RT-qPCR                                                |
| qTaELP4-7A-R           | TGCCAAGCTATCCTCAAGCC                      |                                                                    |
| qTaELP4-7B-F           | GCTCAGAAAGGCTCCTGGTT                      |                                                                    |
| qTaELP4-7B-R           | TGGGATGGACAAGGCTTAGC                      |                                                                    |
| qTaELP4-7D-F           | GCTCGGTCGTGATGGTCAT                       |                                                                    |
| qTaELP4-7D-R           | CACCGGAATTCCTCTCGTCC                      |                                                                    |
| BSMV-CP-F              | TGACTGCTAAGGGTGGAGGA                      |                                                                    |
| BSMV-CP-R              | CGGTTGAACATCACGA AGAGT                    |                                                                    |
| qTaACS2-F              | CTCTTCTCGTGGATGGACCT                      |                                                                    |
| qTaACS2-R              | ATGGTCTCGTCGTCCATGTT                      |                                                                    |
| qTaACS6-F              | GATTTGGTACGTACGCACTTTT                    |                                                                    |
| qTaACS6-R              | CTAAACCTTCCCAAACAATCGC                    |                                                                    |
| qTaActin-F             | GGAATCCATGAGACCACCTAC                     |                                                                    |
| qTaActin-R             | GACCCAGACAACCTCGCAAC                      |                                                                    |
| qAtEIN2-F              | CGCAAGCATCGTCCCTCACAATTT                  |                                                                    |
| qAtEIN2-R              | ACAAGTGACAGTCCGCTGAAGACA                  |                                                                    |
| qAtEIN3-F              | TCCTGCACCTTACAAGAAGCCTCA                  |                                                                    |
| qAtEIN3-R              | TTGCCTCACGAGCTTACGGATCTT                  |                                                                    |
| qAtEIL1-F              | AGCTTCAGGACACGACTCTTGGTT                  |                                                                    |
| qAtEIL1-R              | TTAGGCCACCAAGGTGGAGAACT                   |                                                                    |
| qAtARR5-F              | TGATCGGAAGTTCATCGAGCGGTT                  |                                                                    |
| qAtARR5-R              | TCCAGGCATAGAGTAATCCGTCA                   |                                                                    |

|               |                            |
|---------------|----------------------------|
| qAtCBF1-F     | GCATGTCTCAACTTCGCTGA       |
| qAtCBF1-R     | ATCGTCTCCTCCATGTCCAG       |
| qAtCBF2-F     | TGACGTGTCCTTATGGAGCTA      |
| qAtCBF2-R     | CTGCACTCAAAAACATTTGCA      |
| qAtCBF3-F     | GATGACGACGTATCGTTATGGA     |
| qAtCBF3-R     | ACACTCGTTTCTCAGTTTACAAAC   |
| qAtRD29A-F    | GCCGAGAACTTCAGATTGG        |
| qAtRD29A-R    | CCATTCCTCCTCCTCCTTTC       |
| qAtCOR15b-F   | AAAGCAGAGTGGTGTGTTGGTACCGT |
| qAtCOR15b-R   | TCATCGAGGATGTTGCCGTCACCT   |
| qAtKIN1-F     | ACCAACAAGAATGCCTTCCA       |
| qAtKIN1-R     | CCGCATCCGATACACTCTTT       |
| qAtCOR47-F    | CAGTGTTCGGAGAGTGTGGTG      |
| qAtCOR47-R    | ACAGCTGGTGAATCCTCTGC       |
| qAtActin-F    | GGTAACATTGTGCTCAGTGGTGG    |
| qAtActin-R    | AACGACCTTAATCTTCATGCTGC    |
| qAtACS2-F     | AGGAAGAACATTCACCTAGTCG     |
| qAtACS2-R     | CTCTAAAACCAGGAAGTCCCAT     |
| qAtACS6-F     | CTGAATTCAGACAAGCTGTAGC     |
| qAtACS6-R     | CGGGATTAGCTAAACAGAAAGC     |
| qAtACS2-156F  | TTTGGTCTCCTCAAGGTTTCTG     |
| qAtACS2+8R    | AGACCCATTTGCTGTGTCAAT      |
| qAtACS2+784F  | GAGAGGGTGGTTATGAGCG        |
| qAtACS2+884R  | AGTACGGGGAGGGAATGAG        |
| qAtACS2+1386F | AGGAAGAACATTCACCTAGTCG     |
| qAtACS2+1561R | CTCTAAAACCAGGAAGTCCCAT     |
| qAtACS2+1966F | ATACTCTCCATGTGGCGCTTG      |
| qAtACS2+2152R | TGGAGACGAGAGACCATCCT       |
| qAtACS6-325F  | TCTCAGGTCCCCCACAATGA       |
| qAtACS6-126R  | ACCGAGTATGTGGAGCGTTG       |
| qAtACS6+42F   | TTGTCTAAAATCGCCTCCGGT      |
| qAtACS6+290R  | ACGCATCAAATCTCCACAAAGC     |
| qAtACS6+583F  | CACACGAGACGGTTGCTTTC       |
| qAtACS6+774R  | CACTCCGGTTCTCCATCTCA       |
| qAtACS6+1598F | ACCGATGGCTGCAACAACAT       |
| qAtACS6+1713R | ATGAGGCGAGAAGAAGCCATC      |

Primers for ChIP-  
qPCR
